# Supplementary material for: Phylogenetic reassessment of tribe Anemoneae (Ranunculaceae): Non-monophyly of Anemone s.l. revealed by plastid datasets
Source: PubMed Central journal article supplement (PMC5376084; doi:10.1371/journal.pone.0174792), 2017-03-31

A. nrITS

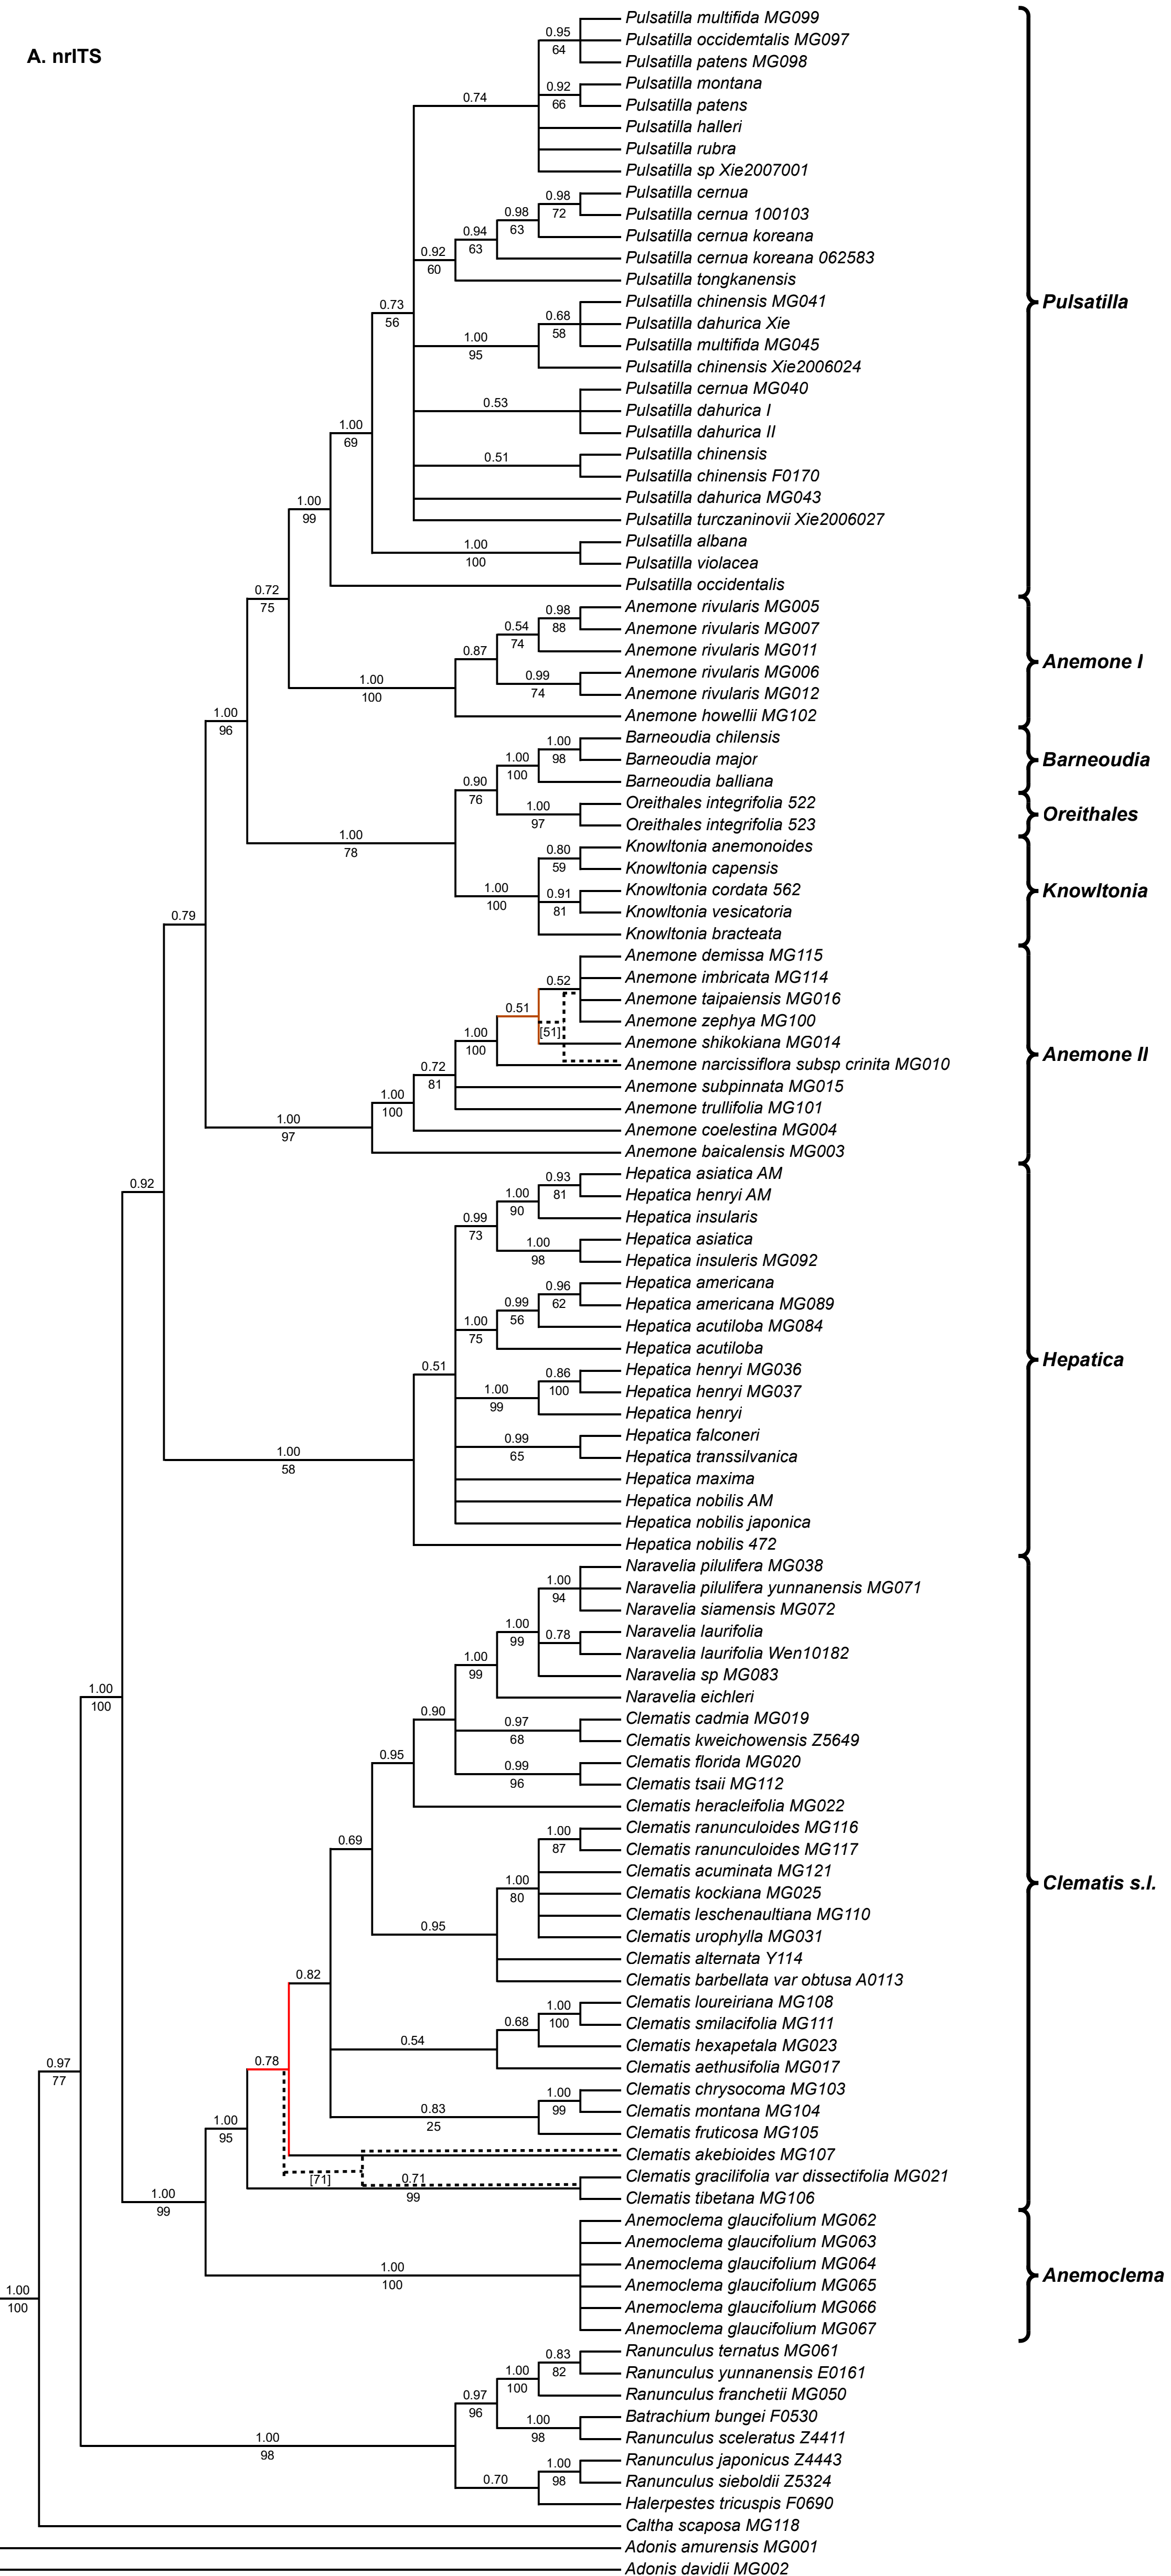

**B. *atpB-rbcL***

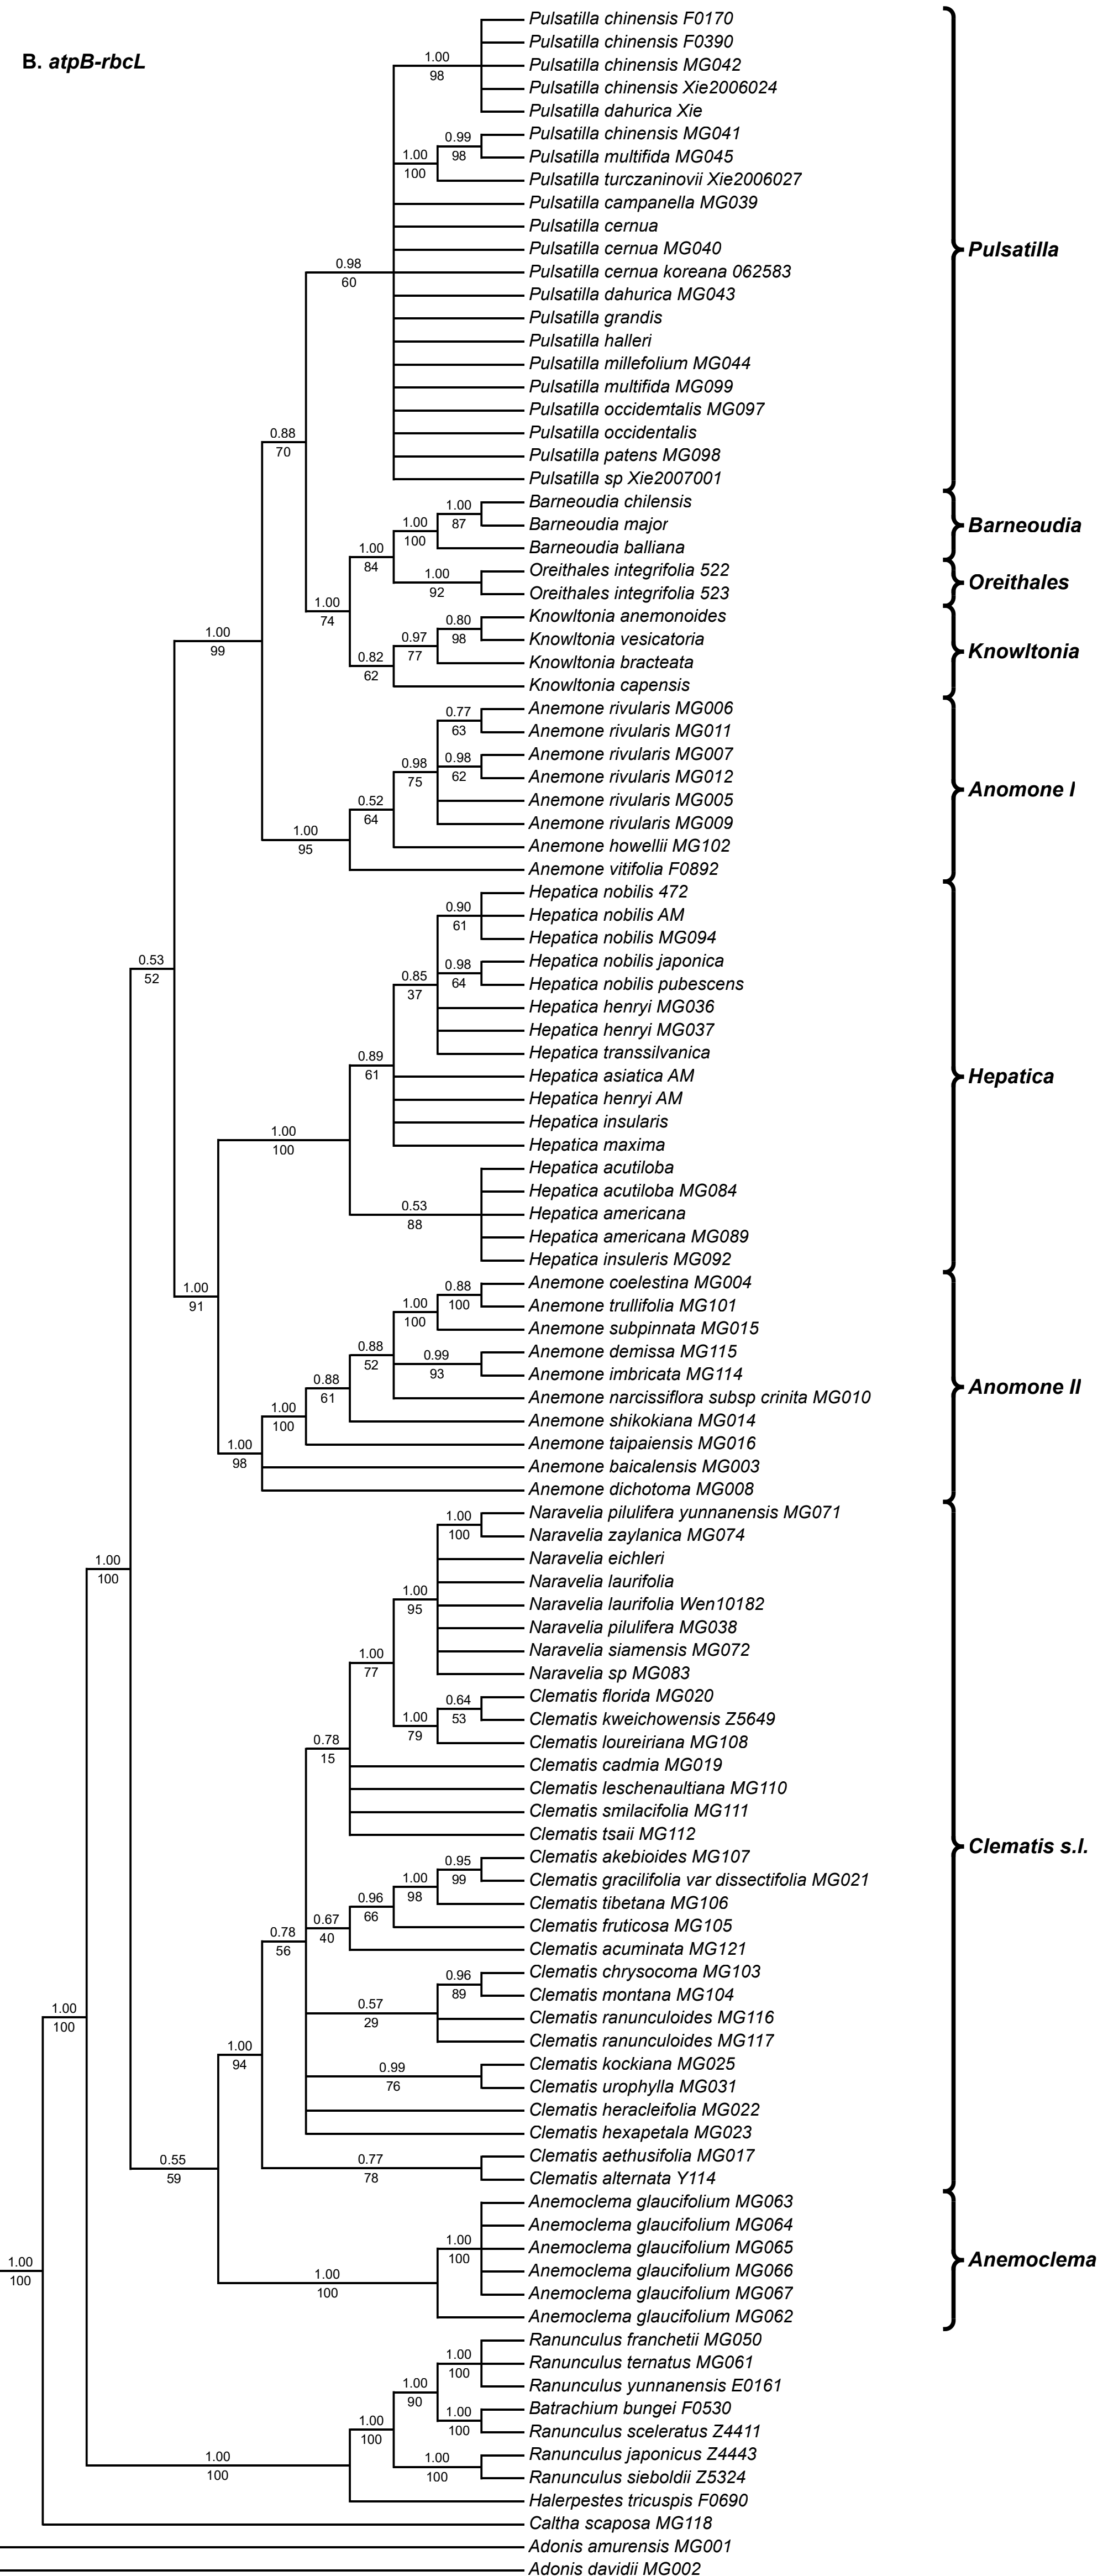

C. matK

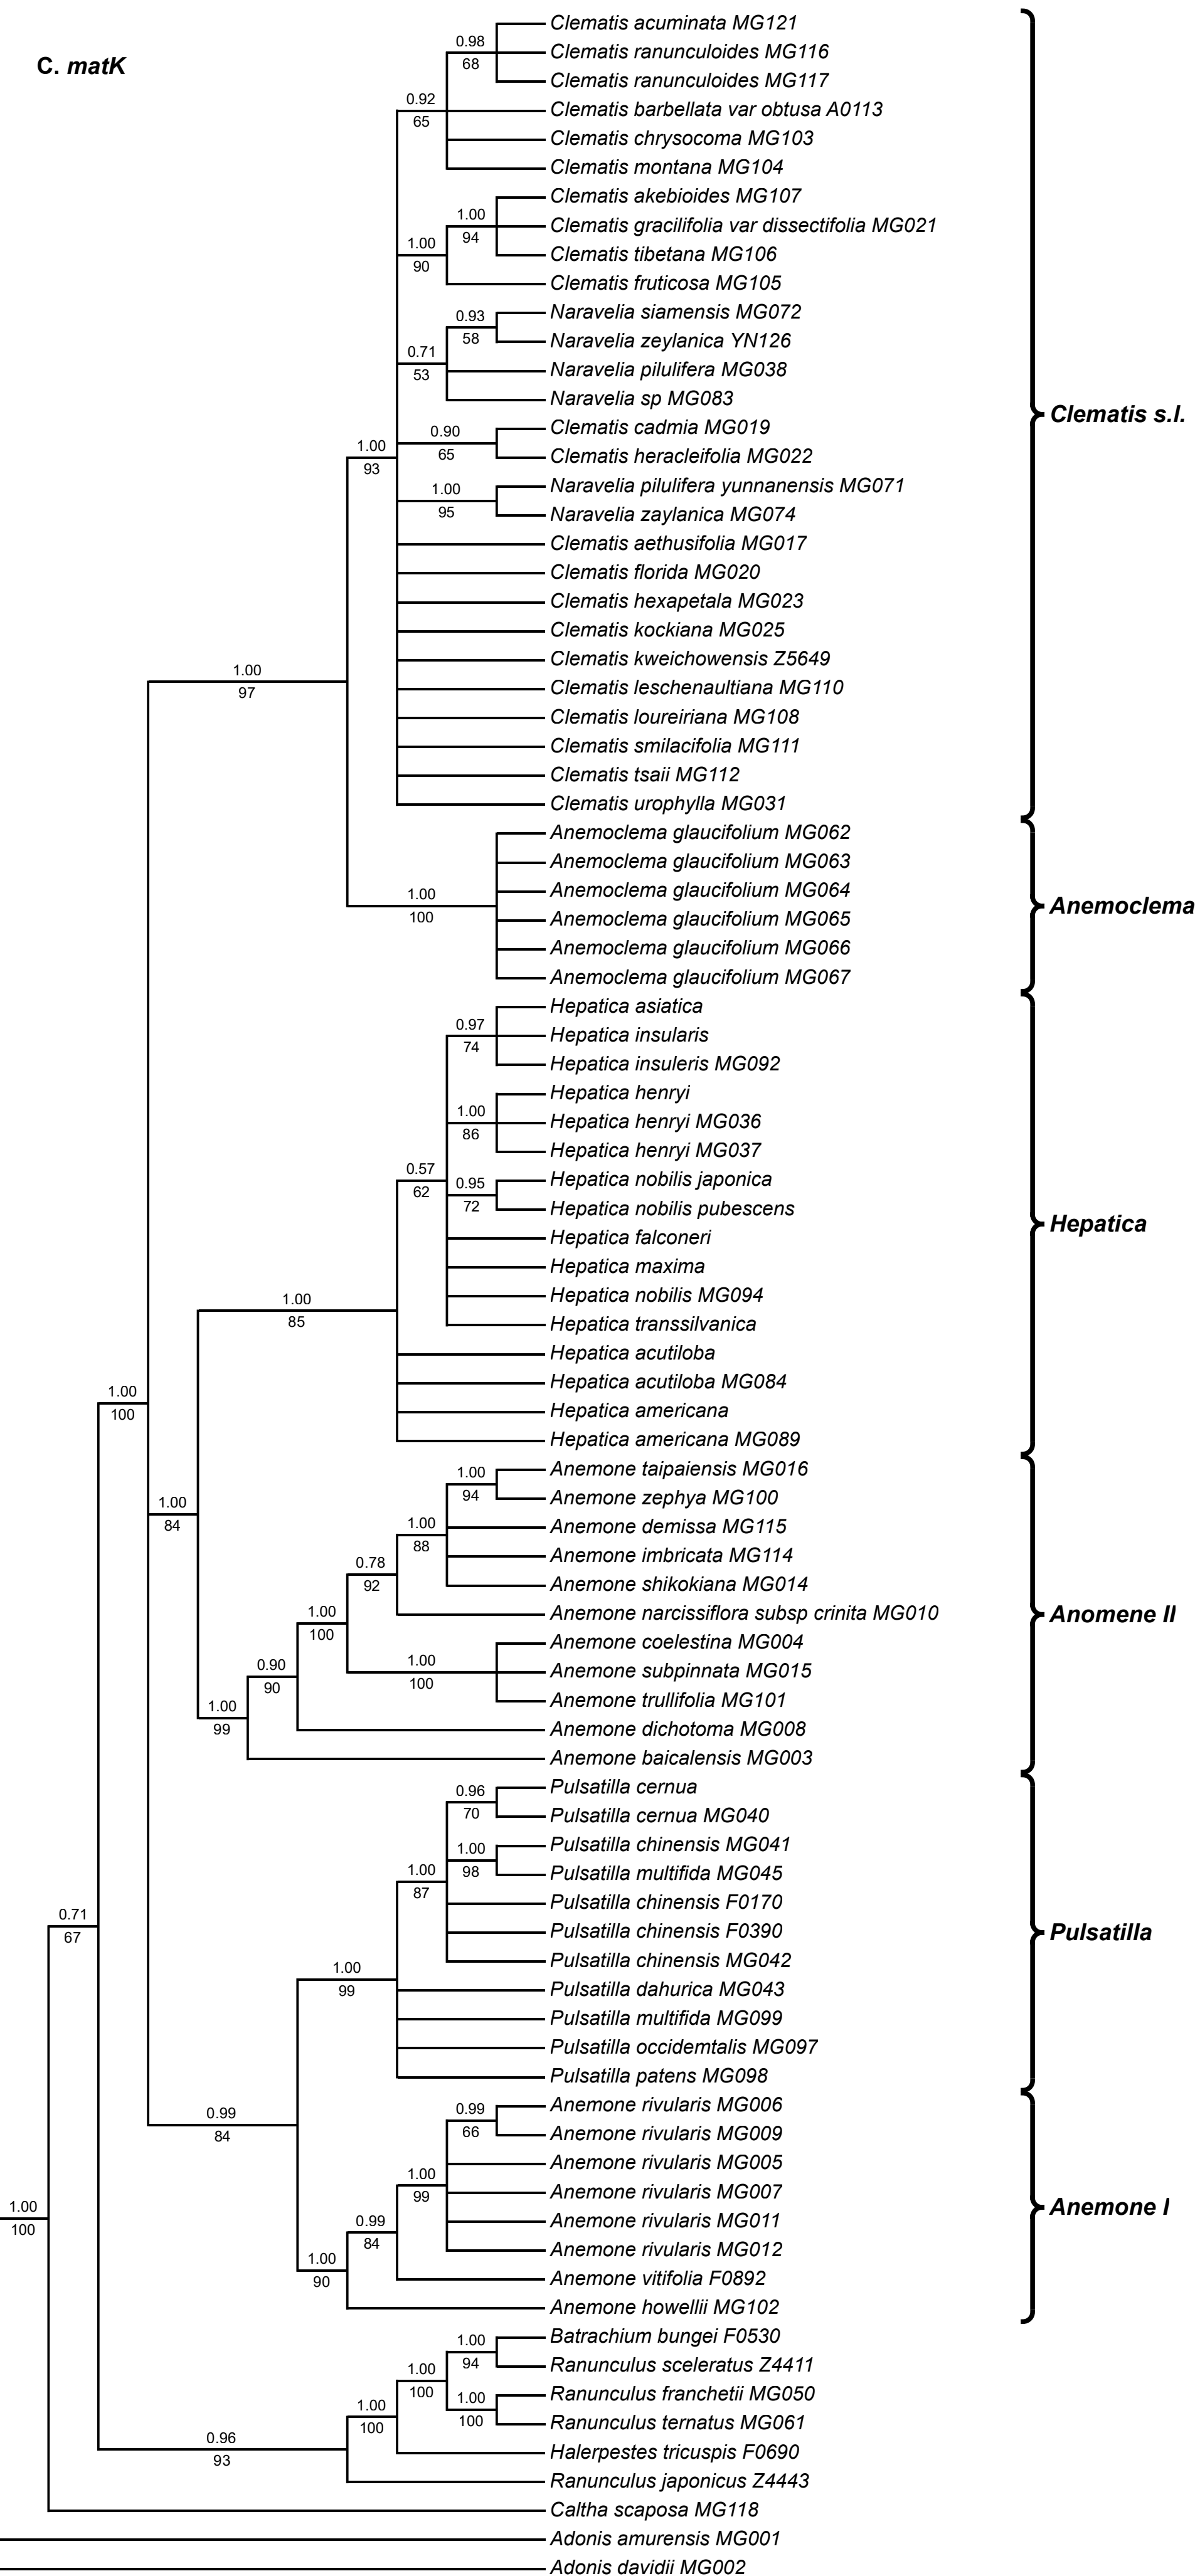

D. *psbA-trnQ*

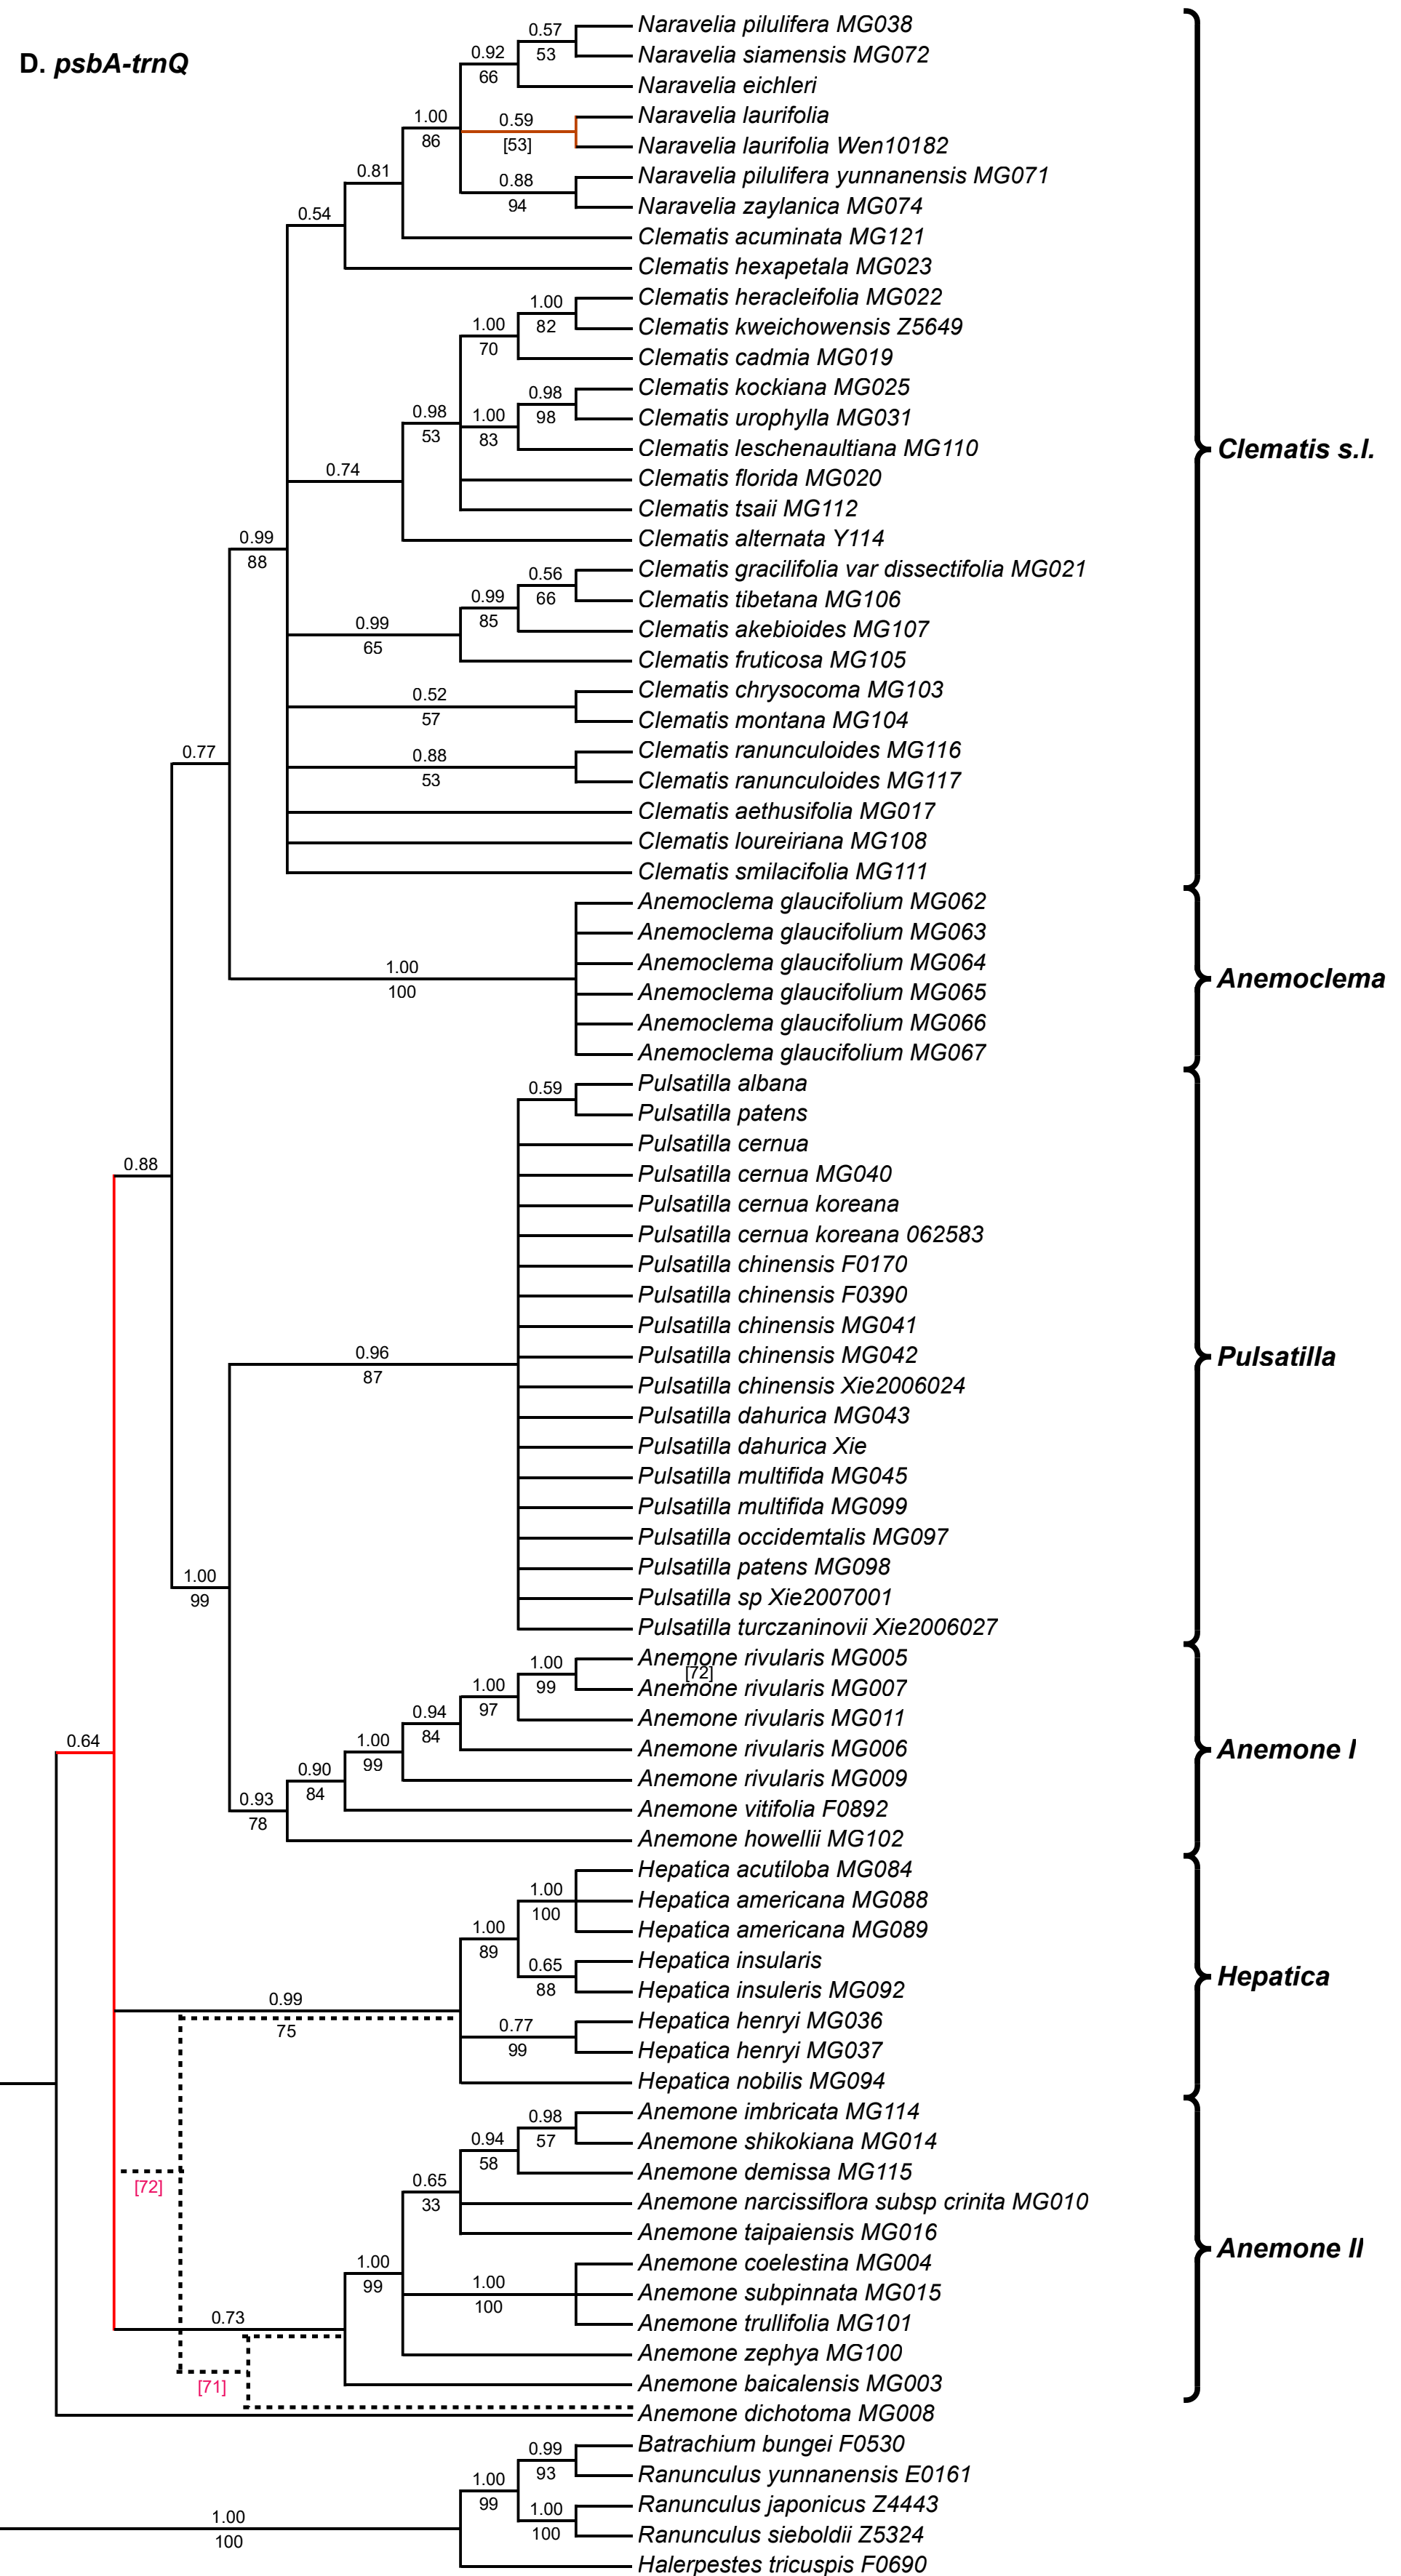

**E. rbcL**

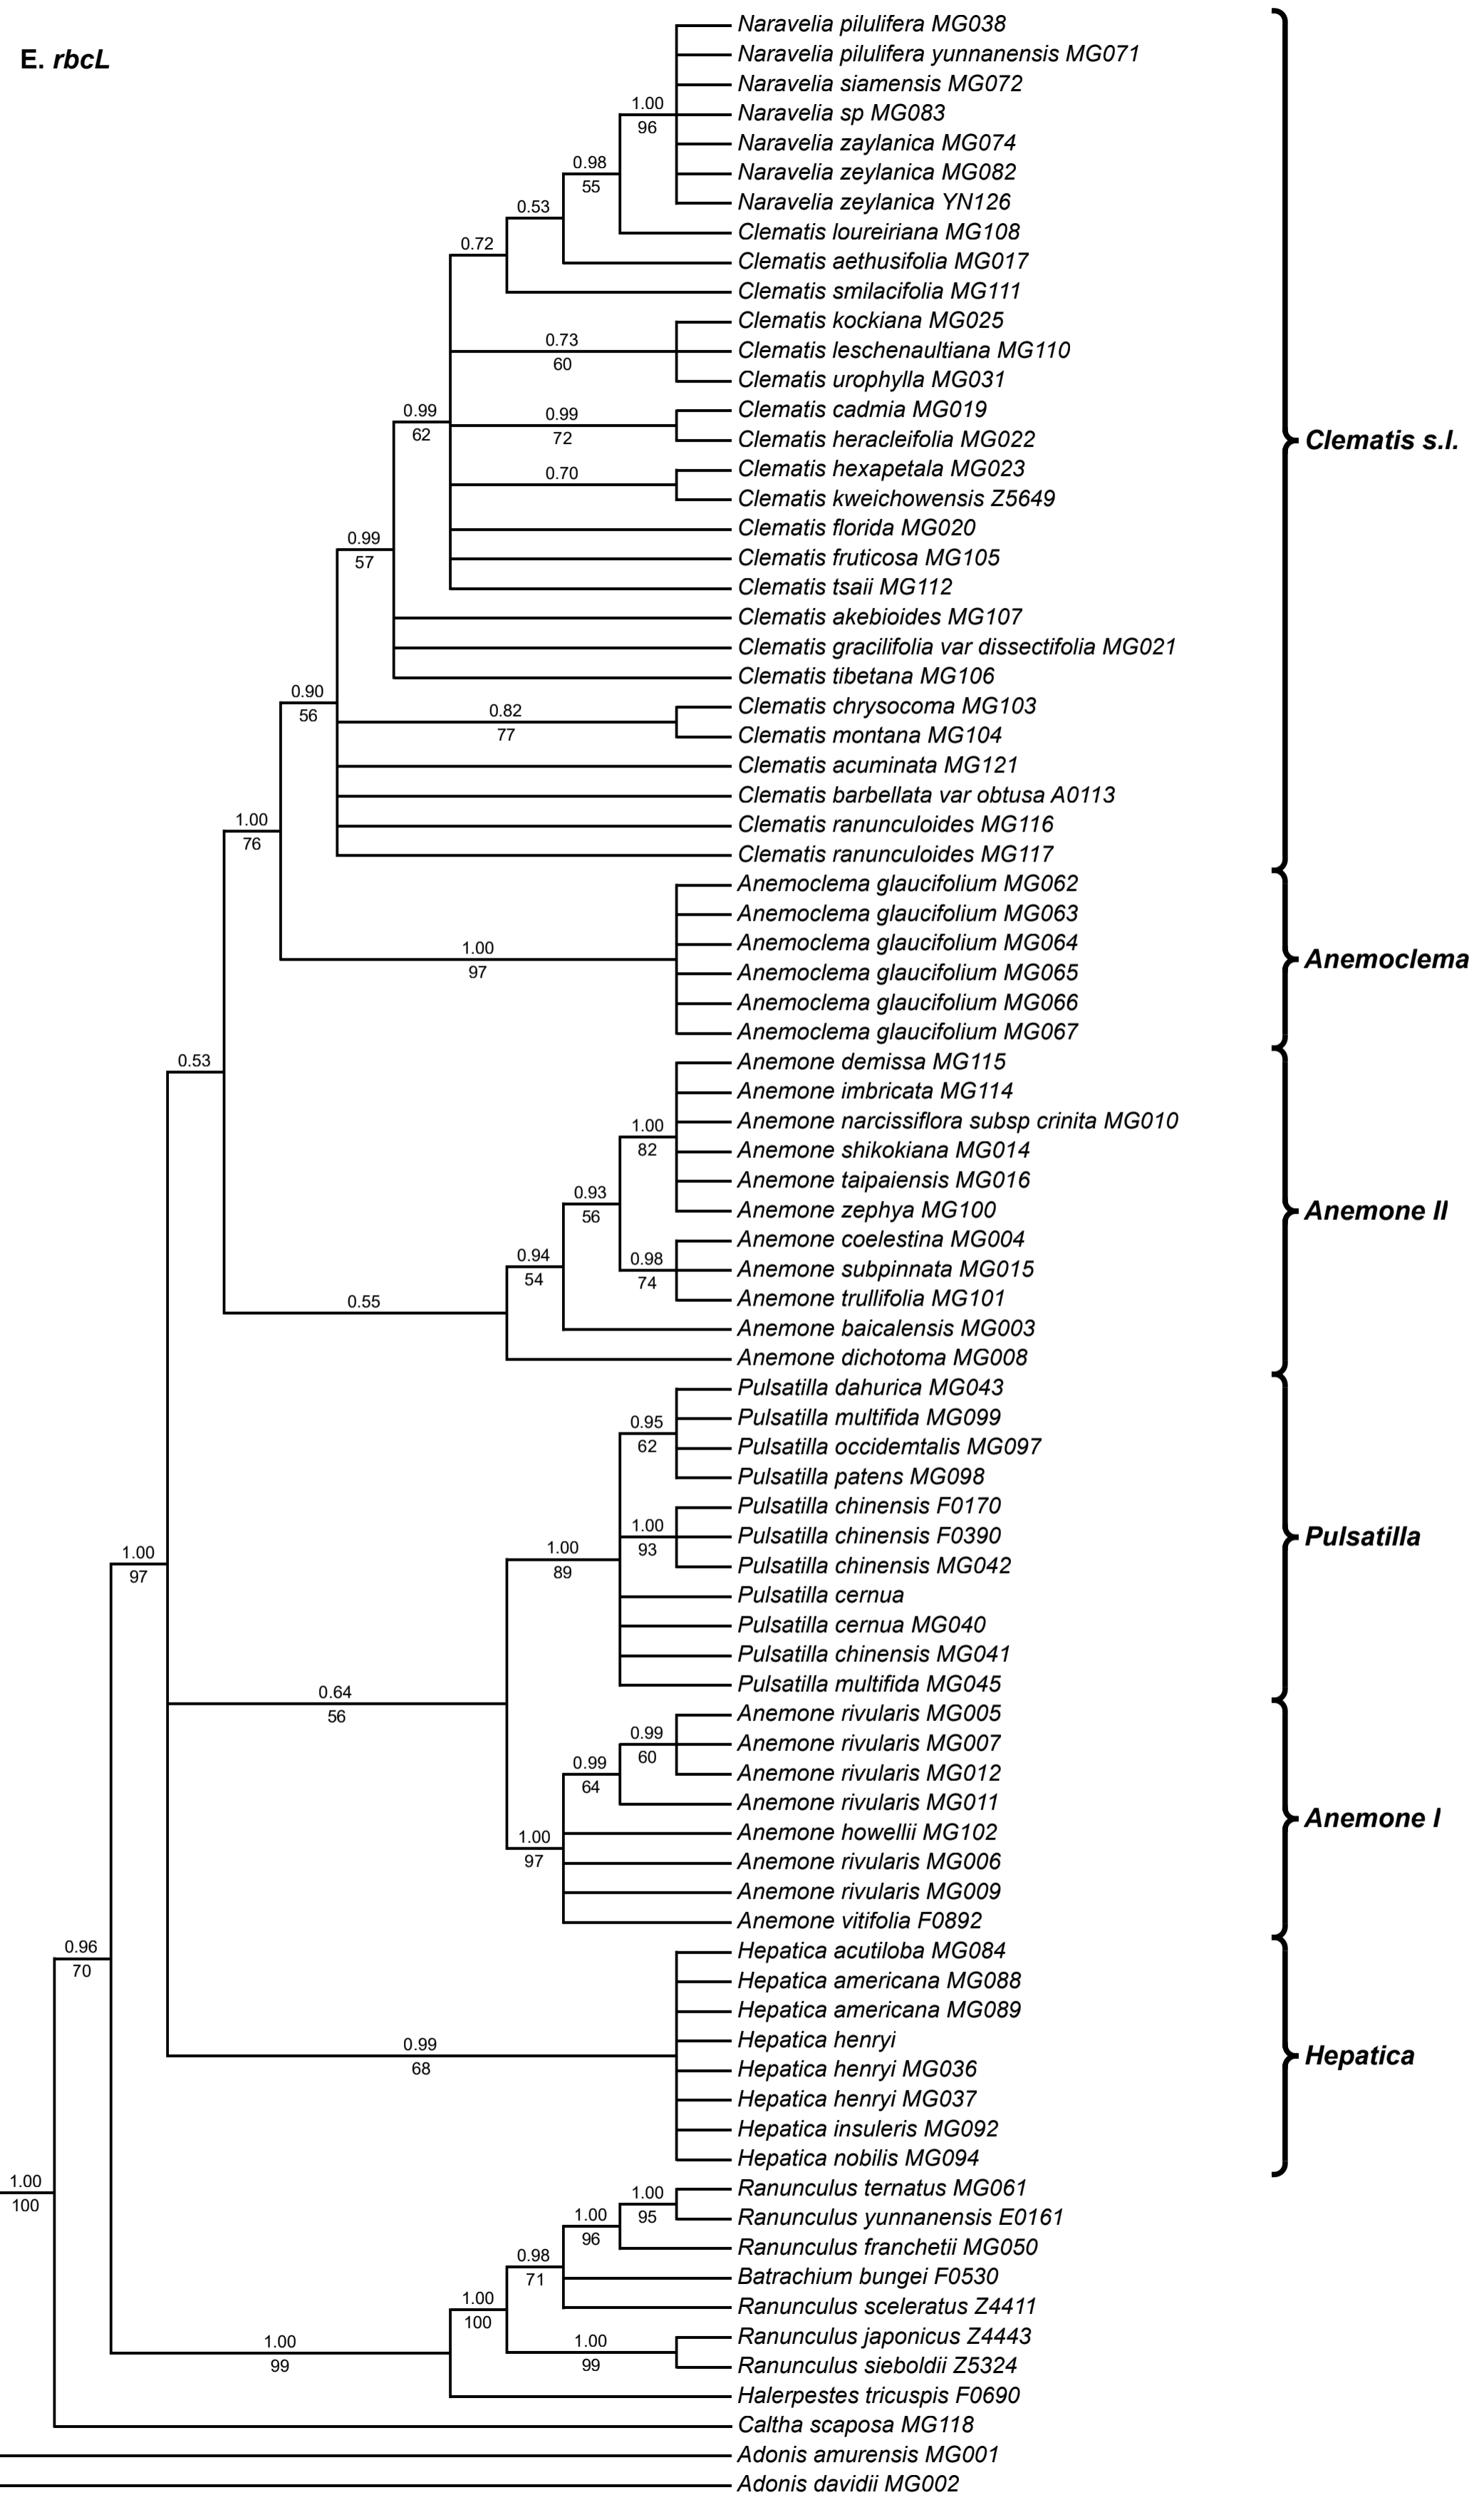

**F. rpoB-trnC**

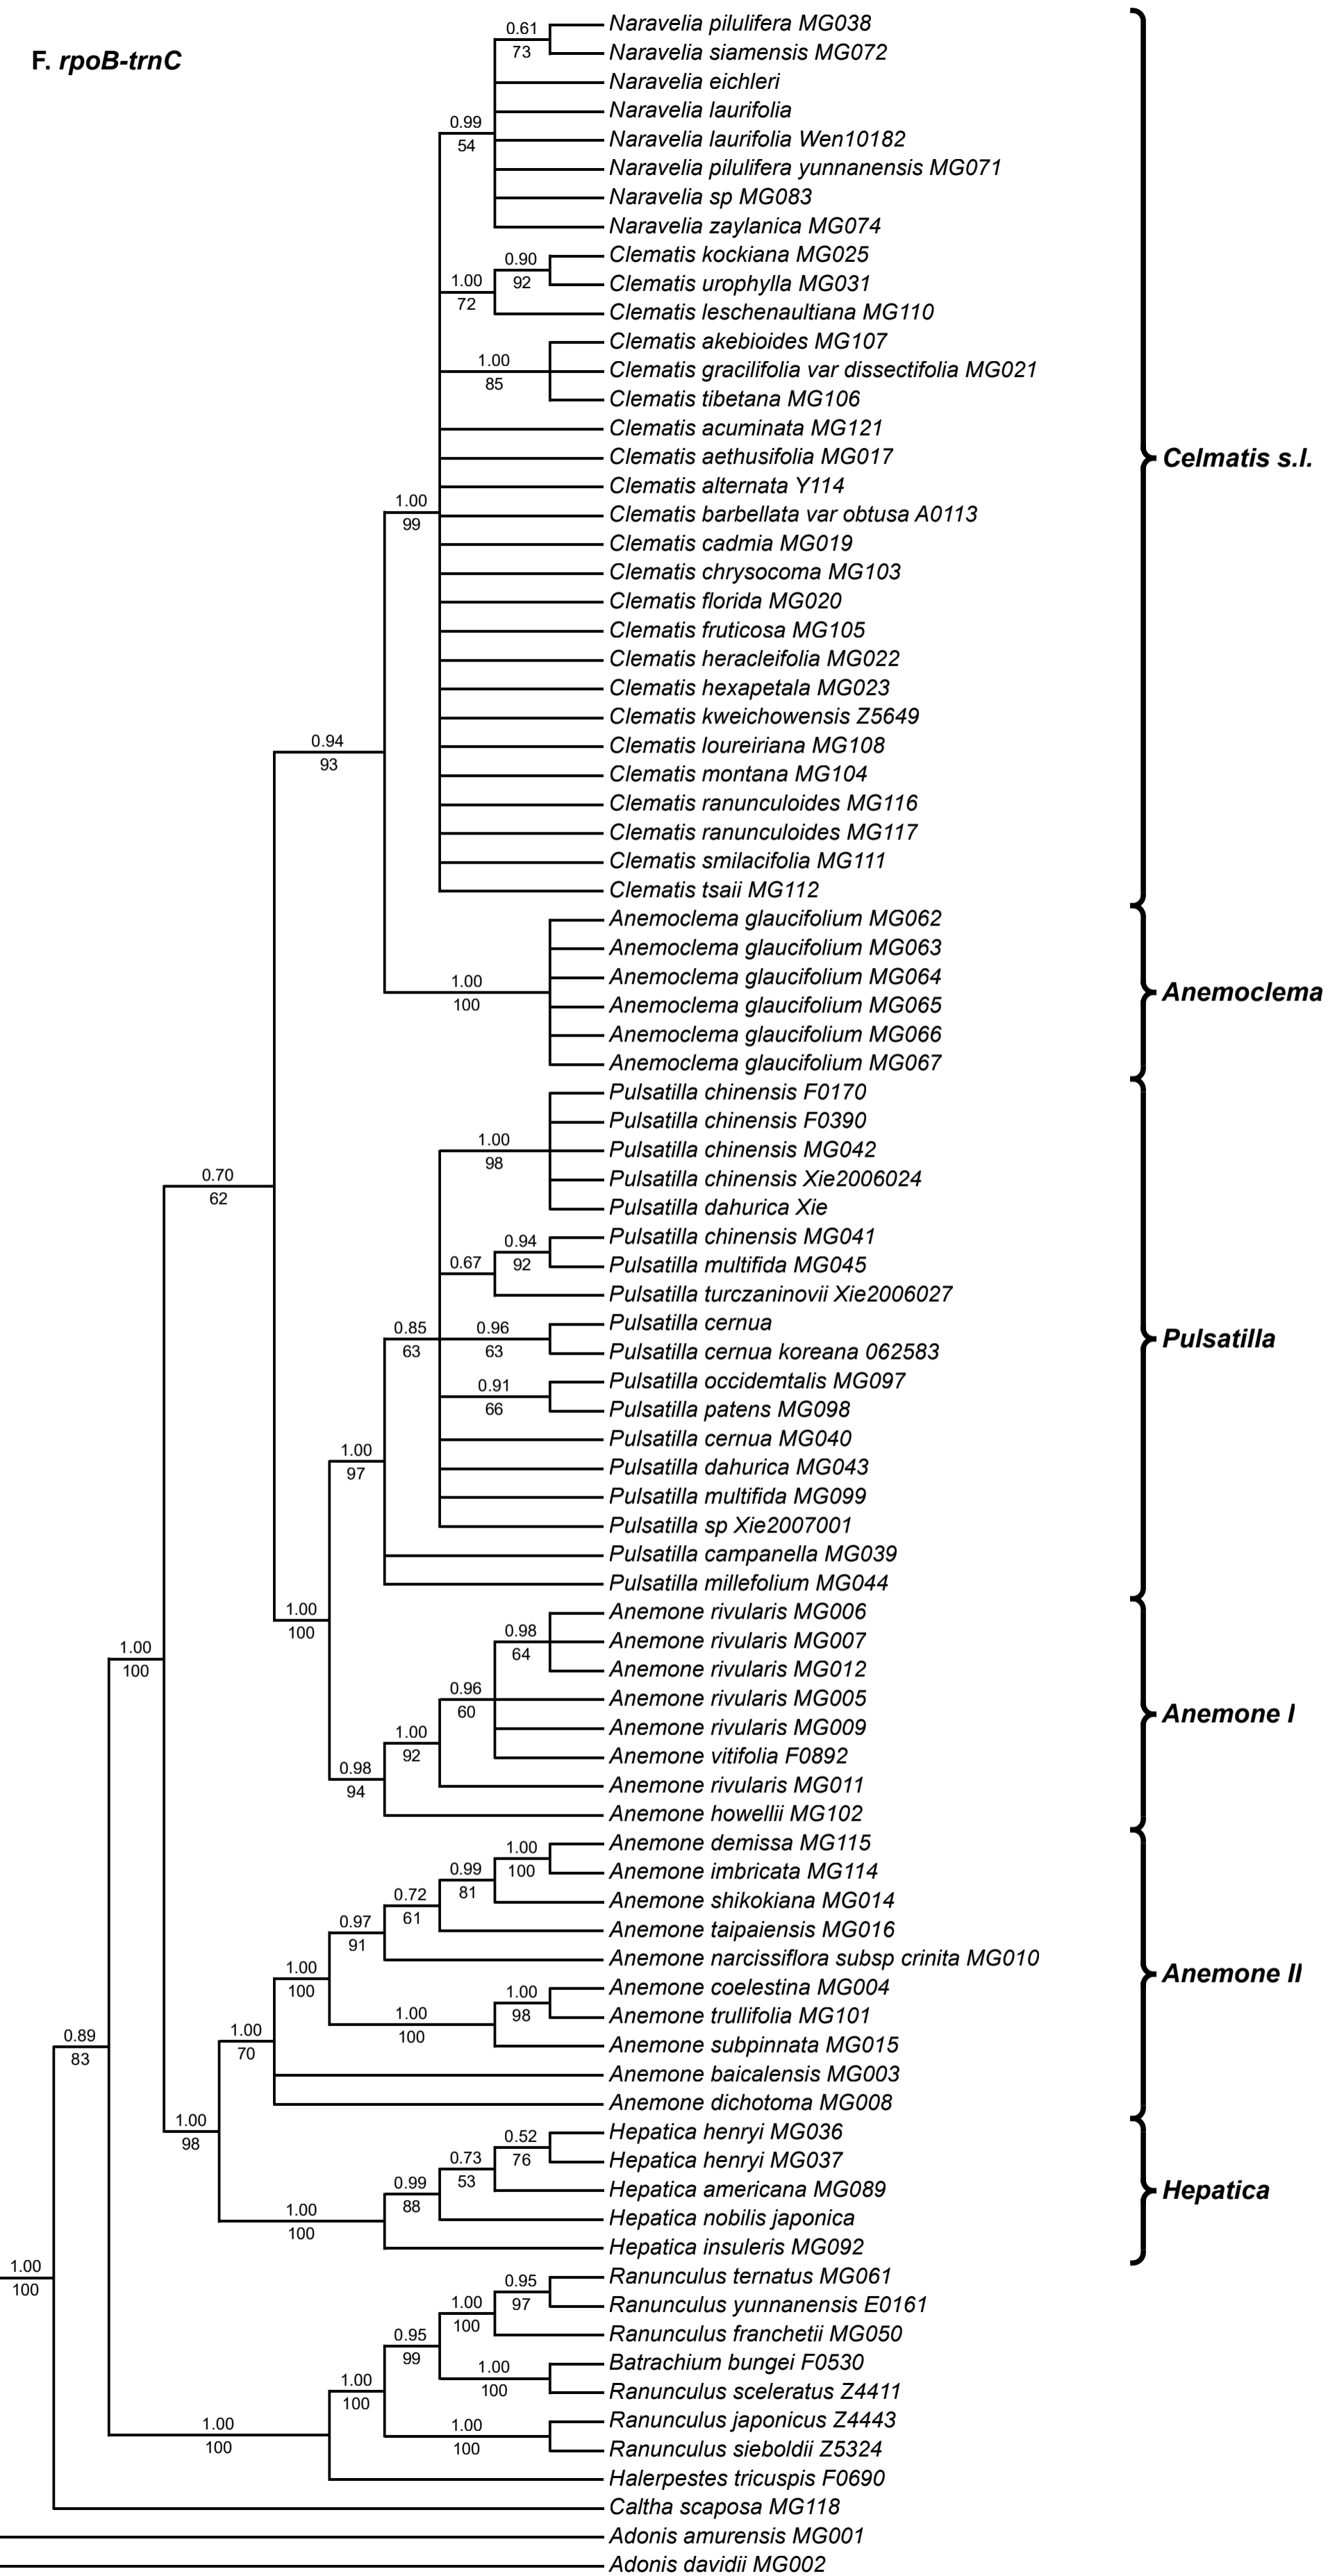

**G. rps16**

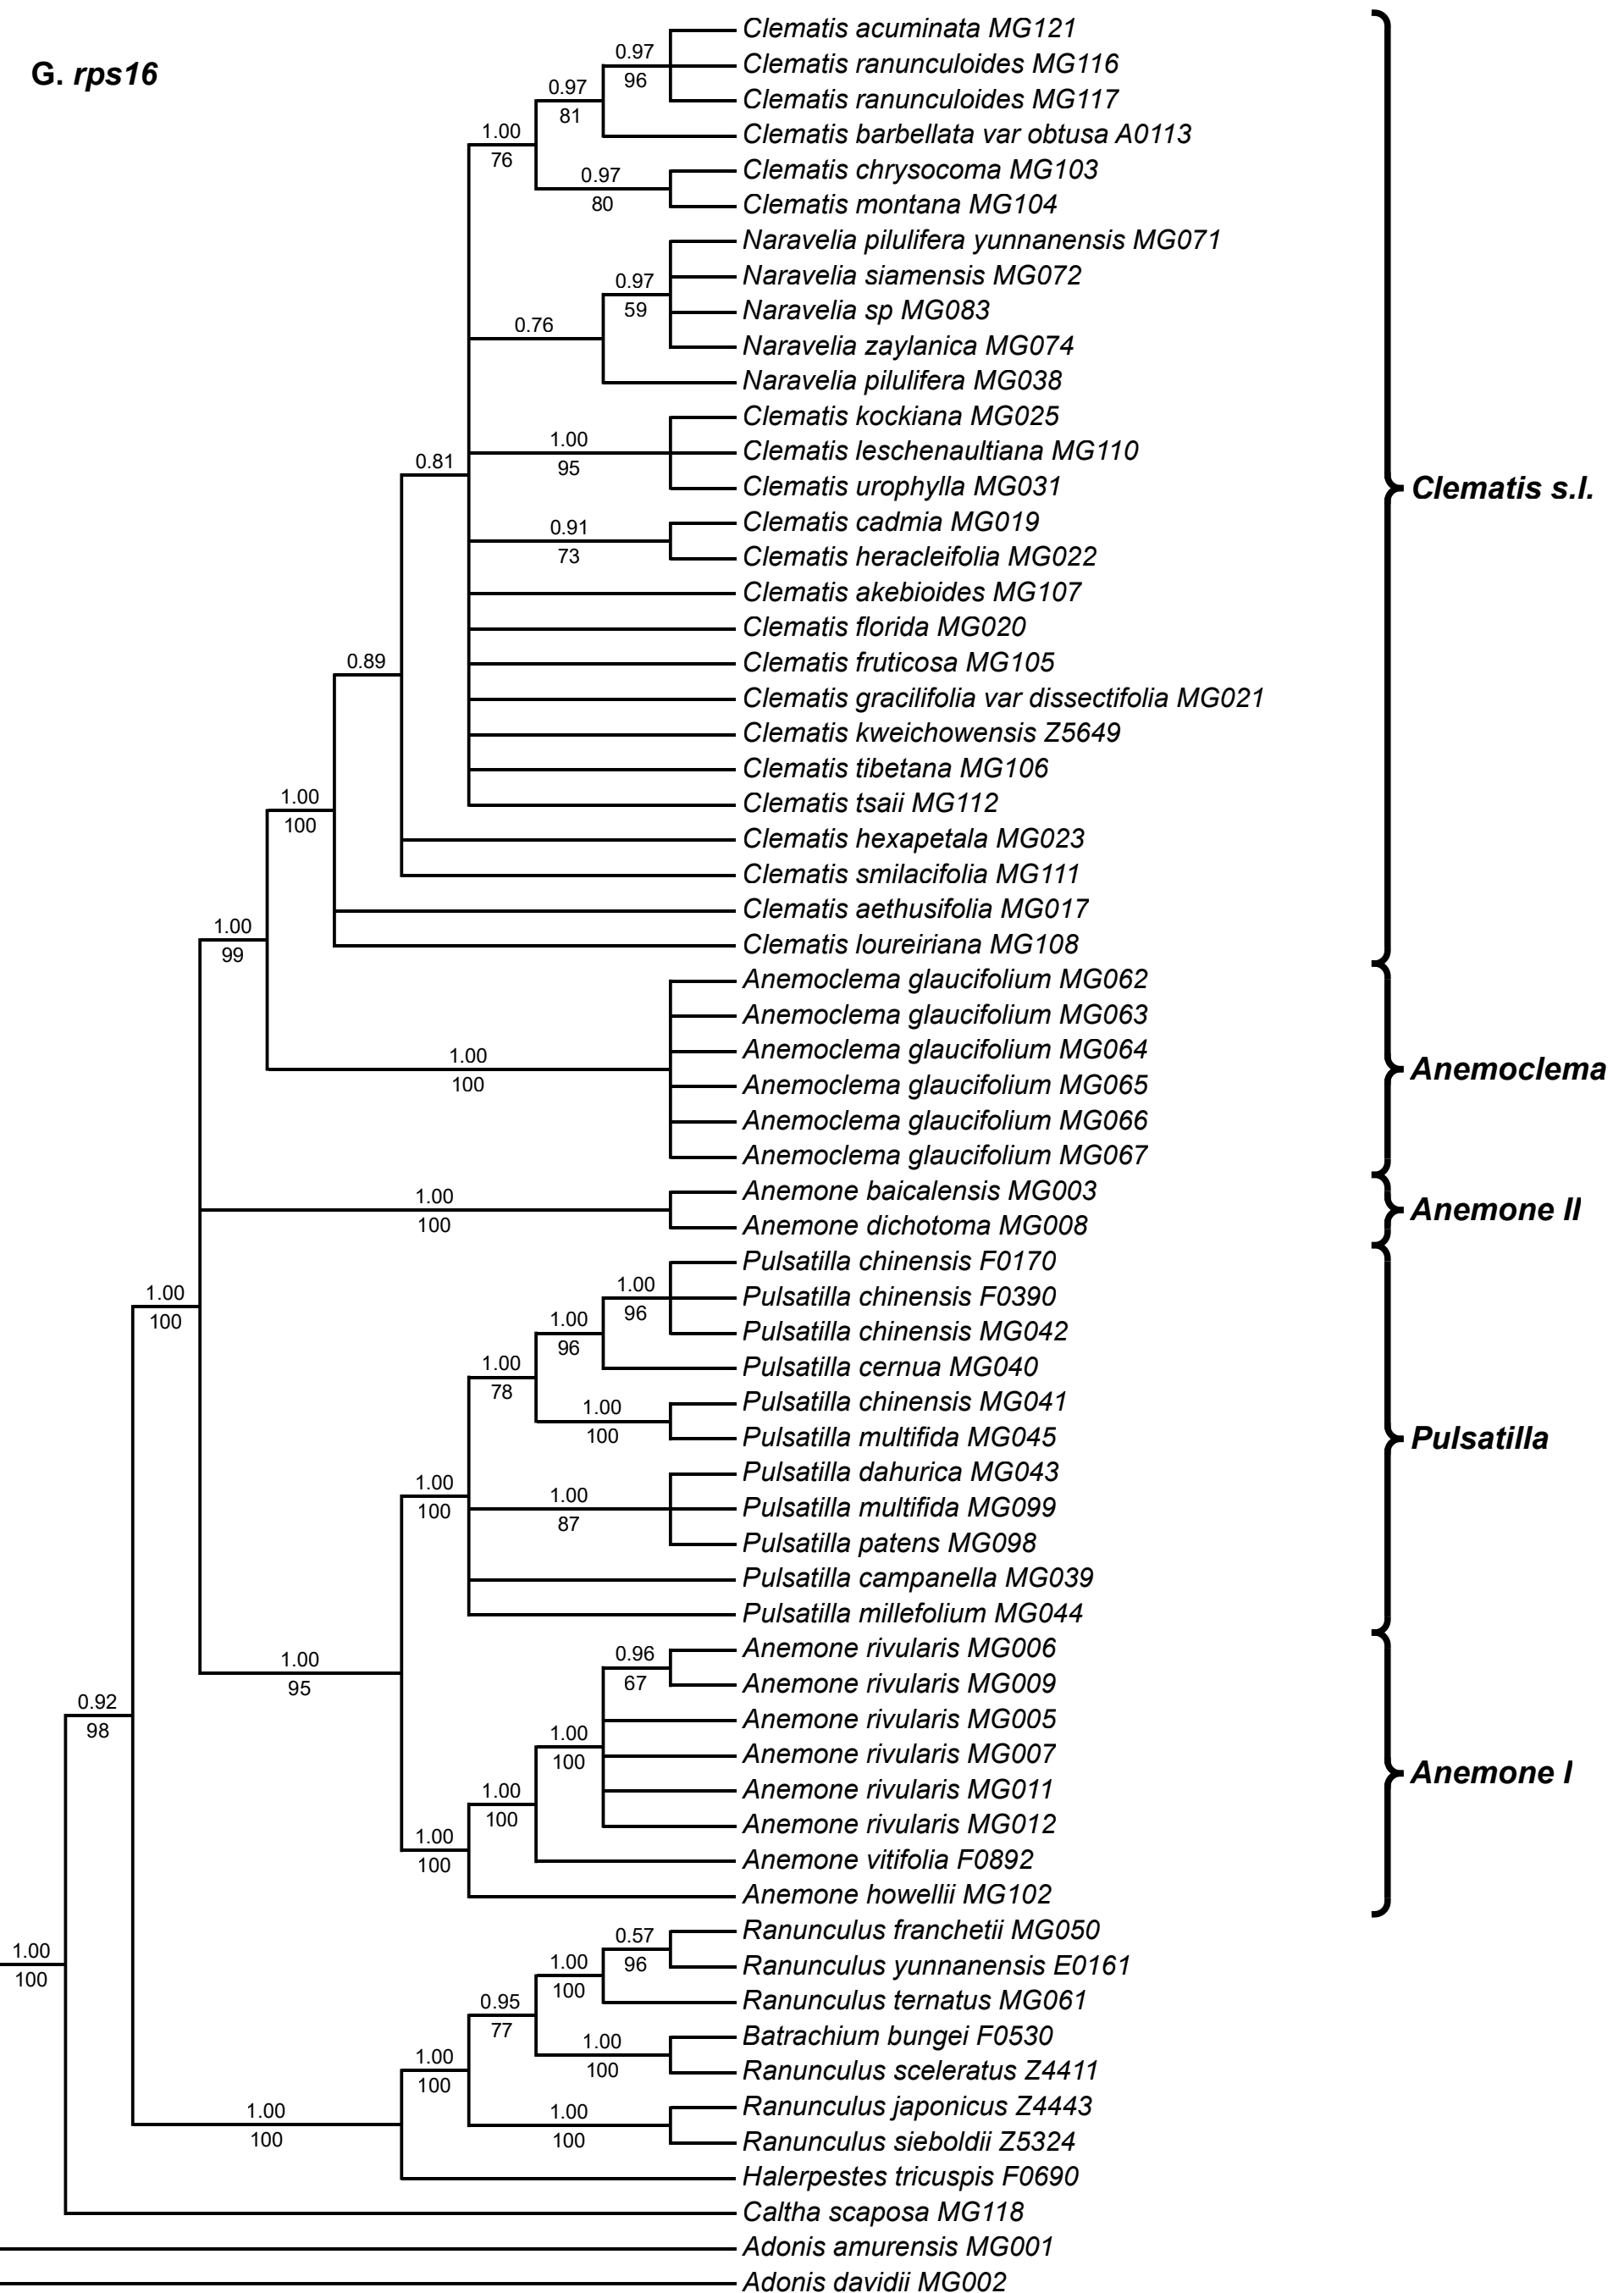

Supplement: pone.0174792.s004.pdf [file pone.0174792.s004.pdf]
