# Supplementary material for: Phylogenetic reassessment of tribe Anemoneae (Ranunculaceae): Non-monophyly of Anemone s.l. revealed by plastid datasets
Source: PubMed Central journal article supplement (PMC5376084; doi:10.1371/journal.pone.0174792), 2017-03-31

# A. ML tree

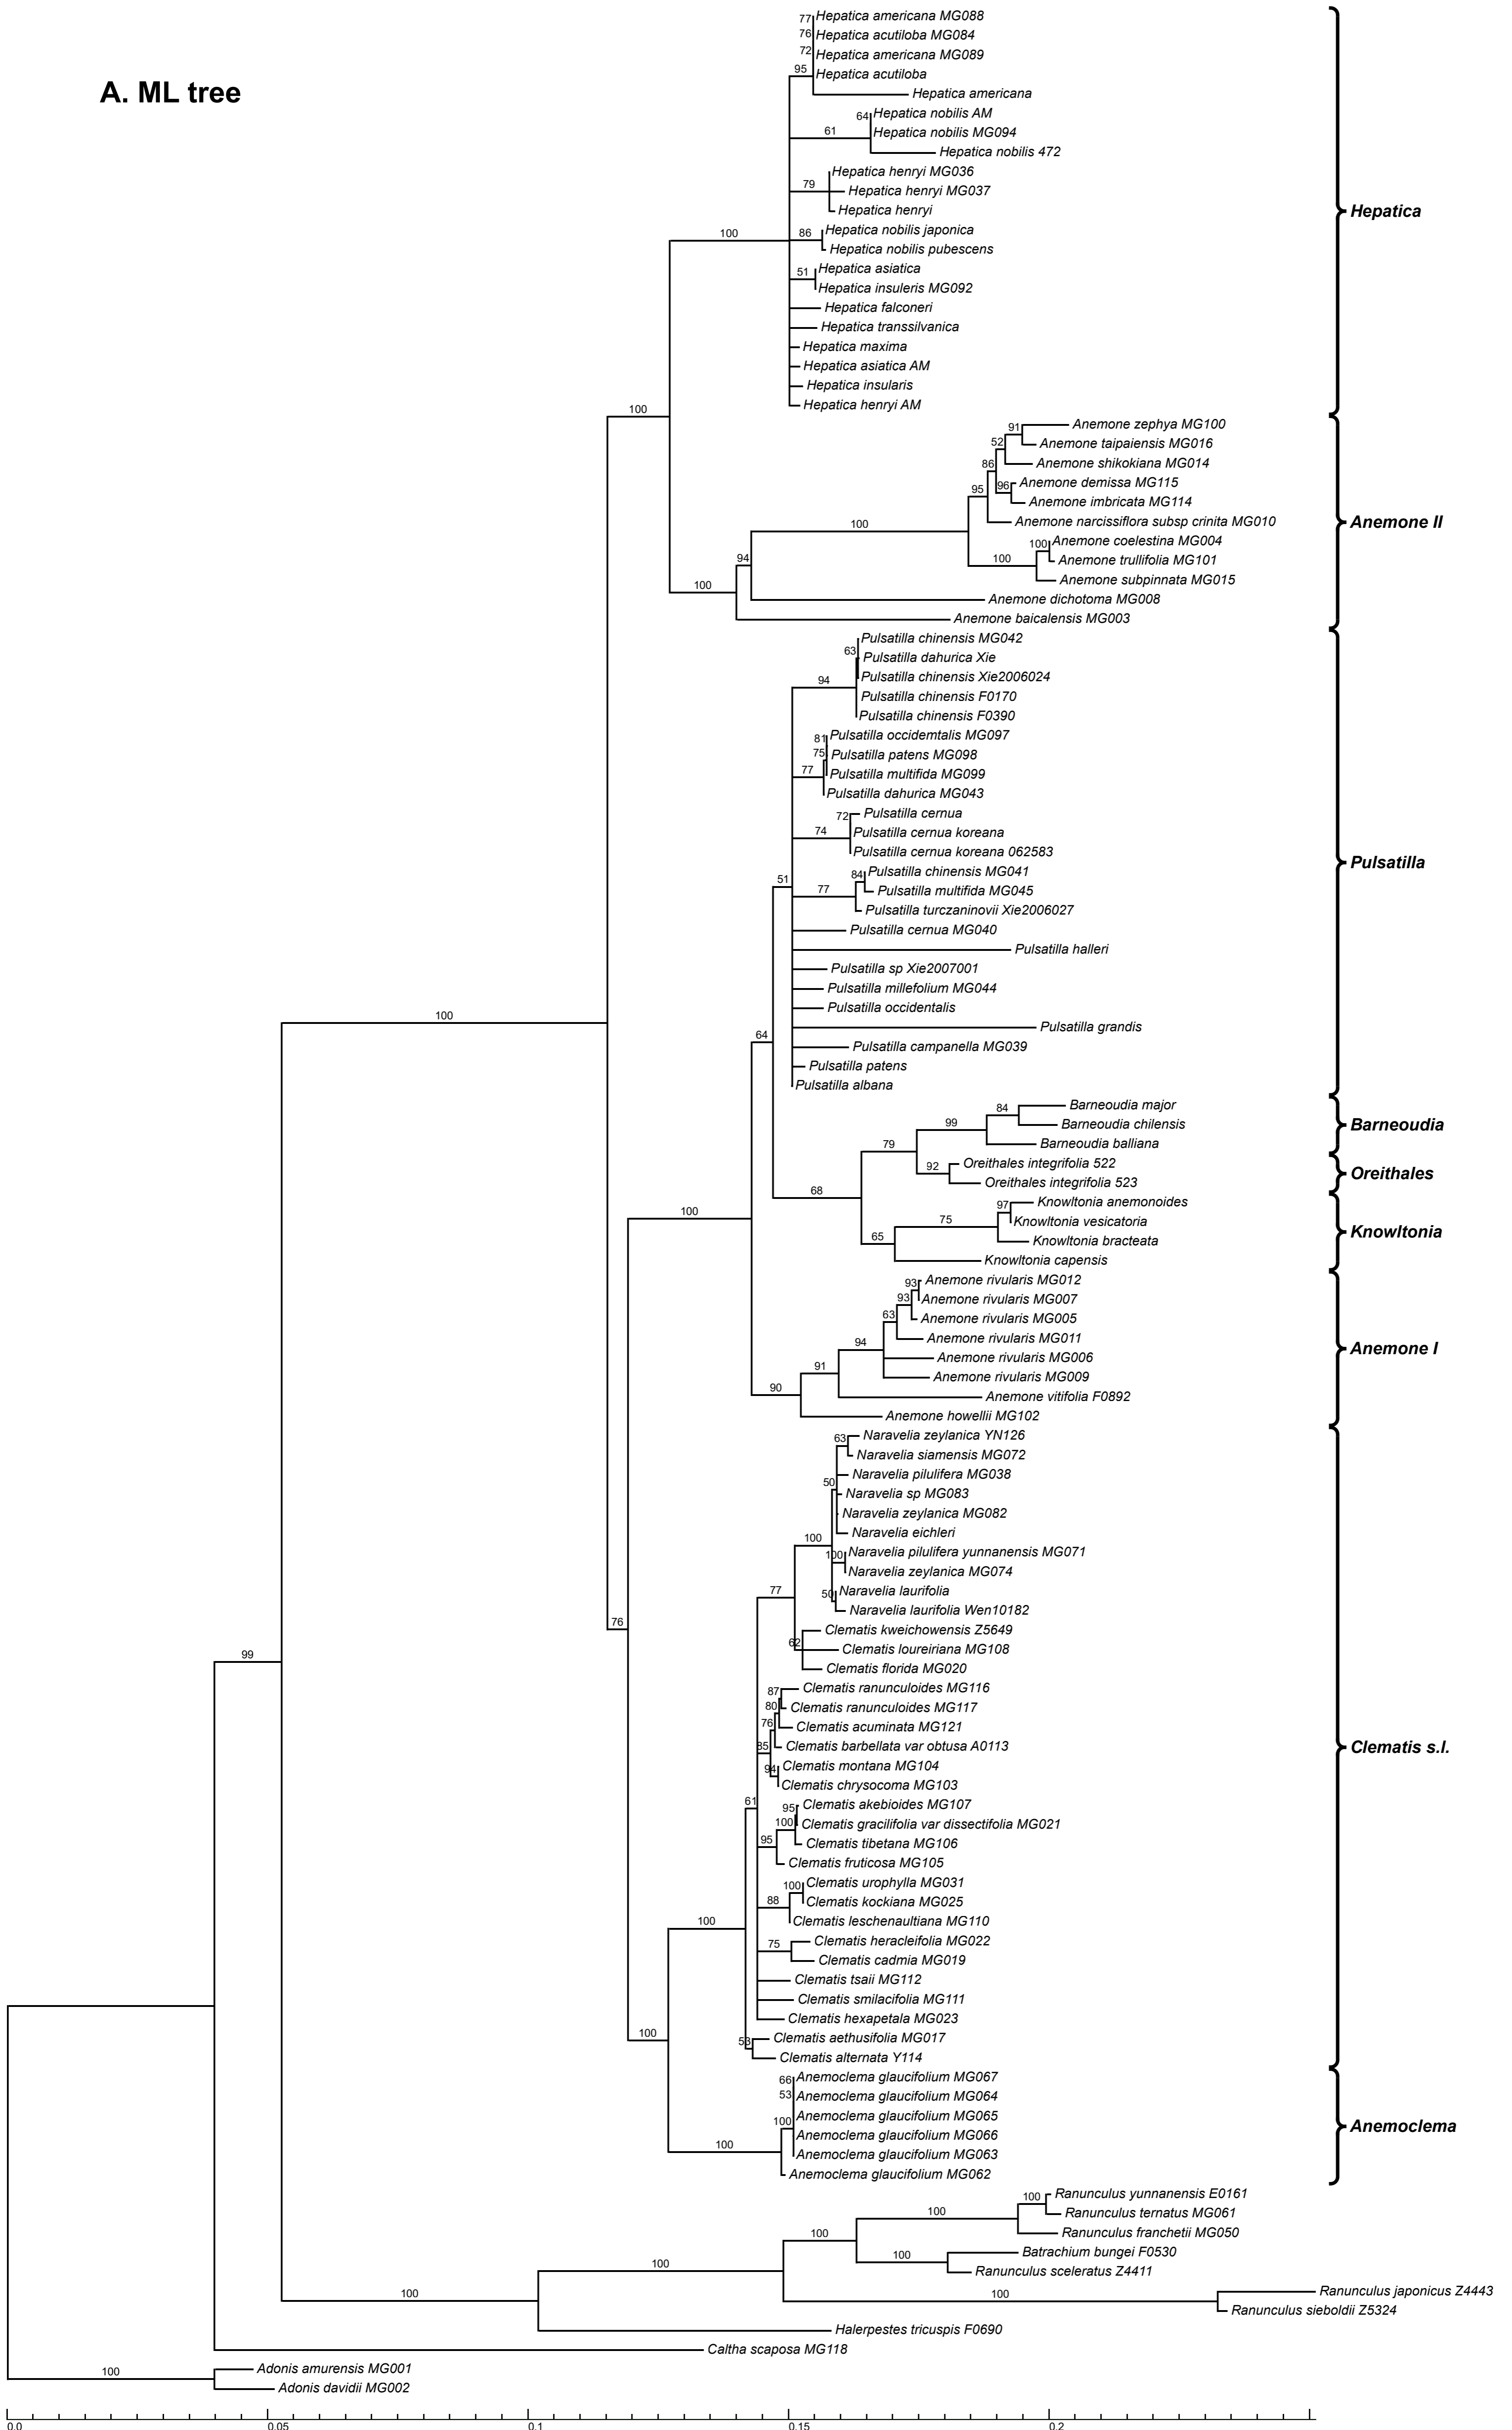

# B. BI tree

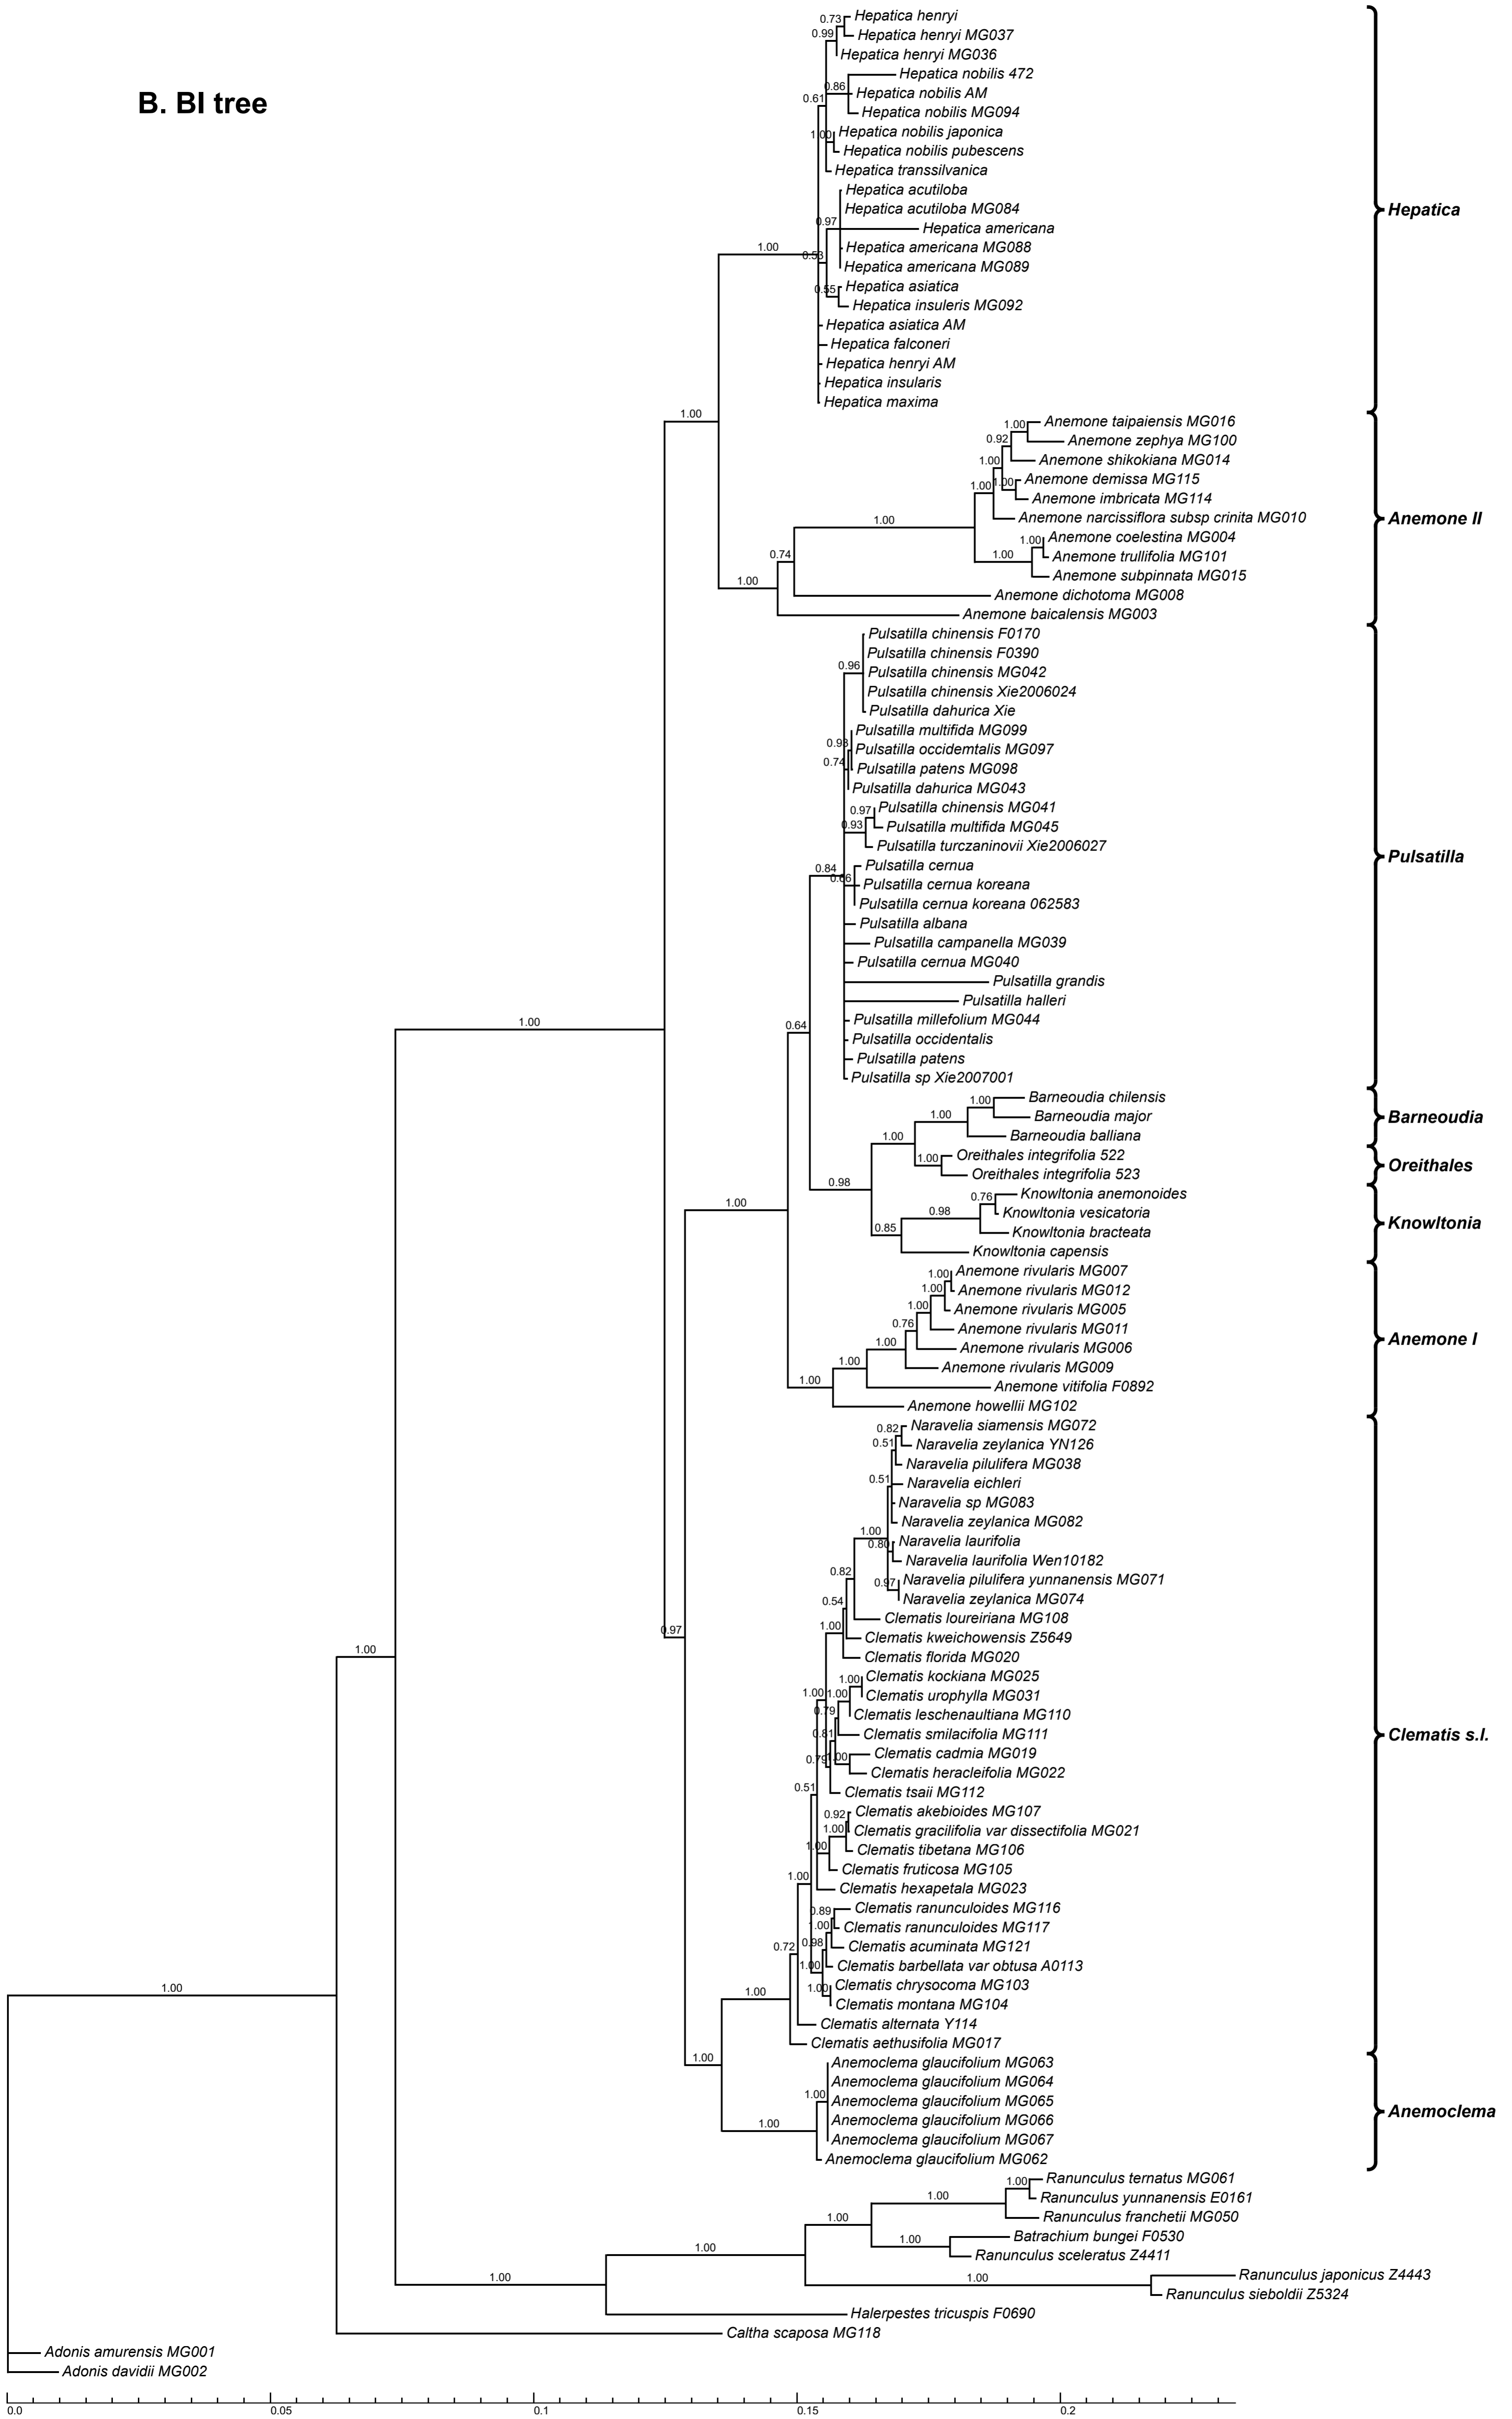

Supplement: pone.0174792.s008.pdf [file pone.0174792.s008.pdf]
